# Supplementary material for: Low-energy electron interaction with 2-(trifluoromethyl)acrylic acid, a potential component for EUVL resist material
Source: Royal Society of Chemistry journal article supplement (doi:10.1039/d3cp01860a), 2023-01-01
Supplement: d3cp01860a1.pdf [file d3cp01860a1.pdf]

## Supporting information file for:

### Study of low-energy electron interaction with 2-(trifluoromethyl) acrylic acid (TFMAA), a potential component for EUVL resist material

Reza Tafrishi<sup>1</sup>, Daniela Torres-Diaz<sup>2</sup>, Lionel Amiaud<sup>2</sup>, Anne Lafosse<sup>2</sup>, Oddur Ingólfsson<sup>1</sup>

<sup>1</sup> Science Institute and Department of Chemistry, University of Iceland, Dunhagi 3, 107 Reykjavik, Iceland

<sup>2</sup> Université Paris-Saclay, CNRS, Institut des Sciences Moléculaires d'Orsay, 91405 Orsay, France

Table S1: Positively charged and neutral structure of all the fragments along with their XYZ-outputs.

| 140: [C <sub>2</sub> H <sub>2</sub> CF <sub>3</sub> COOH] <sup>+</sup>             | 140: Neutral                                                                        |
|------------------------------------------------------------------------------------|-------------------------------------------------------------------------------------|
| 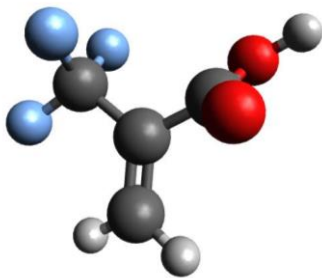 |  |
| O -0.617288 1.490195 -0.407922                                                     | O 0.159257 0.352894 -0.784879                                                       |
| C 0.049277 0.643123 0.295074                                                       | C -0.039282 0.930368 0.422342                                                       |
| H -0.064112 1.992245 -1.041153                                                     | H 0.492846 1.047819 -1.373483                                                       |
| O 1.241496 0.372871 0.262370                                                       | O 0.186642 2.091793 0.635808                                                        |
| C -0.606841 -0.153513 1.366870                                                     | C -0.562885 -0.032133 1.434527                                                      |
| C -1.103825 0.625113 2.602853                                                      | C -0.829375 0.538411 2.811779                                                       |
| C -0.630196 -1.509240 1.269820                                                     | C -0.794014 -1.312547 1.162146                                                      |
| H -0.120813 -2.027930 0.466055                                                     | H -0.604748 -1.706464 0.174206                                                      |
| H -1.183896 -2.098396 1.992875                                                     | H -1.174543 -1.986909 1.916127                                                      |
| F -2.039648 1.491450 2.220975                                                      | F -1.749325 1.517375 2.772672                                                       |
| F -1.613359 -0.215367 3.492545                                                     | F -1.297399 -0.407896 3.653036                                                      |
| F -0.080586 1.287570 3.137788                                                      | F 0.284914 1.041651 3.368190                                                        |

123: [C<sub>2</sub>H<sub>2</sub>CF<sub>3</sub>CO]<sup>+</sup>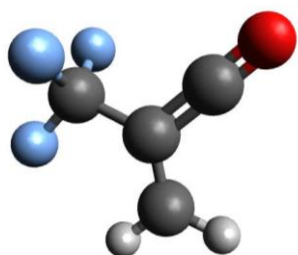

|   |           |           |          |
|---|-----------|-----------|----------|
| C | 0.045092  | 0.975997  | 0.708518 |
| O | 0.503452  | 1.745209  | 0.037691 |
| C | -0.532536 | 0.030483  | 1.561745 |
| C | -0.886484 | 0.532637  | 2.984656 |
| C | -0.736096 | -1.217503 | 1.101258 |
| H | -0.469225 | -1.519005 | 0.094908 |
| H | -1.184431 | -1.958822 | 1.754488 |
| F | -1.749922 | 1.541043  | 2.892061 |
| F | -1.421823 | -0.462141 | 3.670780 |
| F | 0.220563  | 0.960041  | 3.586975 |

120: [C<sub>2</sub>HCF<sub>2</sub>COOH]<sup>+</sup>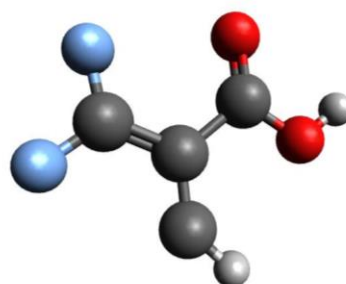

|   |           |           |           |
|---|-----------|-----------|-----------|
| O | -0.047652 | 0.402033  | -0.866171 |
| C | -0.216018 | 1.085662  | 0.256827  |
| H | 0.066153  | 1.014034  | -1.616714 |
| O | -0.236578 | 2.265356  | 0.408662  |
| C | -0.388801 | 0.094420  | 1.425912  |
| C | -0.570542 | 0.600948  | 2.738958  |
| C | -0.377199 | -1.231843 | 1.269836  |
| H | -0.271138 | -1.947774 | 0.464771  |
| F | -0.614349 | 1.824948  | 3.014923  |
| F | -0.704526 | -0.155734 | 3.743757  |

120: [C<sub>2</sub>H<sub>2</sub>CF<sub>2</sub>COO]<sup>+</sup>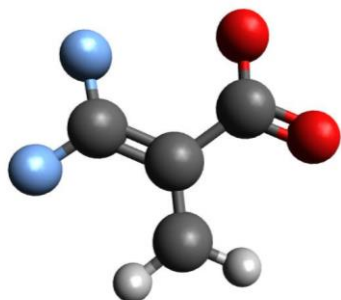

|   |           |           |           |
|---|-----------|-----------|-----------|
| O | 0.252258  | 0.466229  | -0.716491 |
| C | -0.138354 | 0.892054  | 0.384764  |
| O | -0.045698 | 2.124321  | 0.539778  |
| C | -0.681911 | -0.052886 | 1.432000  |
| C | -1.121166 | 0.443007  | 2.681379  |
| C | -0.752232 | -1.385973 | 1.179058  |
| H | -0.413680 | -1.763496 | 0.218287  |
| H | -1.133659 | -2.101142 | 1.899283  |
| F | -1.078019 | 1.662314  | 2.988296  |

101: [C<sub>2</sub>H<sub>2</sub>CF<sub>2</sub>COO]<sup>+</sup>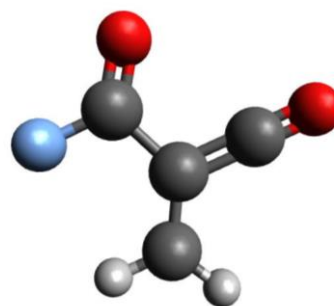

|   |           |           |           |
|---|-----------|-----------|-----------|
| O | 0.455238  | 0.970832  | -0.887537 |
| C | 0.023715  | 0.462067  | 0.007983  |
| O | -0.433413 | 1.910130  | 2.252014  |
| C | -0.511187 | -0.181096 | 1.142166  |
| C | -0.673729 | 0.758411  | 2.312379  |
| C | -0.814216 | -1.493581 | 1.079551  |
| H | -0.670511 | -2.087690 | 0.183963  |
| H | -1.221968 | -1.984415 | 1.957210  |
| F | -1.110279 | 0.112853  | 3.377351  |

|   |           |           |          |
|---|-----------|-----------|----------|
| F | -1.593219 | -0.299518 | 3.591405 |
|---|-----------|-----------|----------|

|                                                                                                                                                                                                                                                                                                          |                                                                                                                                                                                                                                                                          |
|----------------------------------------------------------------------------------------------------------------------------------------------------------------------------------------------------------------------------------------------------------------------------------------------------------|--------------------------------------------------------------------------------------------------------------------------------------------------------------------------------------------------------------------------------------------------------------------------|
| 101: $[\text{C}_2\text{HCF}_2\text{COOH}]^+$                                                                                                                                                                                                                                                             | 95: $[\text{C}_2\text{H}_2\text{CF}_3]^+$                                                                                                                                                                                                                                |
| 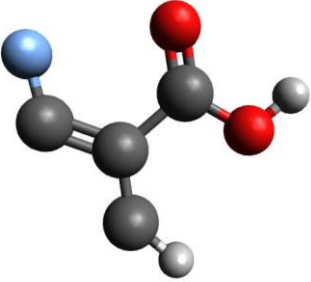                                                                                                                                                                                                                        |                                                                                                                                                                                        |
| O -0.047650 0.402030 -0.866170<br>C -0.216020 1.085660 0.256830<br>H 0.066150 1.014030 -1.616710<br>O -0.236580 2.265360 0.408660<br>C -0.388800 0.094420 1.425910<br>C -0.570540 0.600950 2.738960<br>C -0.377200 -1.231840 1.269840<br>H -0.271140 -1.947770 0.464770<br>F -0.614350 1.824950 3.014920 | C -0.814996 -0.473205 1.925947<br>C -0.848982 0.642425 2.952491<br>C -0.815158 -1.445161 1.128059<br>H -0.435905 -1.328695 0.101248<br>H -1.189668 -2.437256 1.419258<br>F -1.688831 1.583307 2.595115<br>F -1.287475 -0.019798 4.026117<br>F 0.353646 1.129872 3.144454 |

|                                                                                                                                                                                                                                     |                                                                                                                                                                                                                                         |
|-------------------------------------------------------------------------------------------------------------------------------------------------------------------------------------------------------------------------------------|-----------------------------------------------------------------------------------------------------------------------------------------------------------------------------------------------------------------------------------------|
| 95: $[\text{C}_2\text{HF}_2\text{O}_2]^+$                                                                                                                                                                                           | 76: $[\text{C}_2\text{H}_2\text{CF}_2]^+$                                                                                                                                                                                               |
| 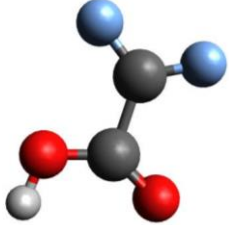                                                                                                                                                 |                                                                                                                                                     |
| O -0.546178 0.712994 -0.177031<br>C 0.170167 1.276921 0.760058<br>H -0.167996 0.855642 -1.067705<br>O 1.167144 1.914753 0.777547<br>C -0.525178 0.989931 2.131308<br>F -1.579404 0.345593 2.256771<br>F -0.012875 1.424485 3.171473 | C -0.990986 -0.536880 1.942528<br>C -1.168868 0.462518 2.863224<br>C -0.827259 -1.468245 1.081714<br>H -0.063878 -1.398325 0.300824<br>H -1.444547 -2.371733 1.091732<br>F -1.856277 1.504385 2.615730<br>F -0.660475 0.418119 4.028738 |

76: [CFCOOH]<sup>+</sup>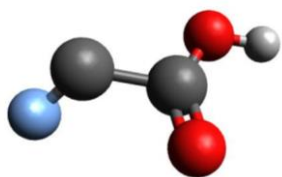

|   |           |          |           |
|---|-----------|----------|-----------|
| O | 0.817697  | 0.542815 | -0.079725 |
| C | -0.067235 | 1.129680 | 0.643052  |
| H | 0.903603  | 0.922149 | -0.980617 |
| O | -0.852403 | 2.014927 | 0.532981  |
| C | -0.270974 | 0.474054 | 2.040754  |
| F | -0.041337 | 1.044325 | 3.094125  |

75: [C<sub>3</sub>HF<sub>2</sub>]<sup>+</sup>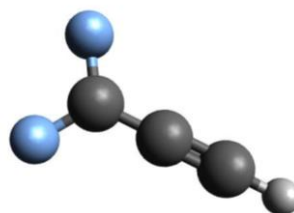

|   |           |           |          |
|---|-----------|-----------|----------|
| C | -1.032724 | -0.535578 | 2.086128 |
| C | -1.177104 | 0.523732  | 2.944357 |
| C | -0.906570 | -1.468694 | 1.328723 |
| H | -0.794830 | -2.297775 | 0.655018 |
| F | -1.468184 | 1.682704  | 2.545961 |
| F | -1.028129 | 0.411912  | 4.190103 |

75: [CFCOO]<sup>+</sup>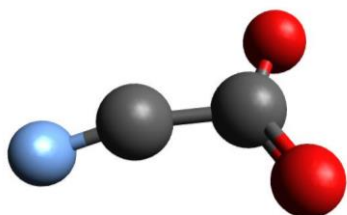

|   |          |         |          |
|---|----------|---------|----------|
| O | -0.12823 | 0.11680 | -0.11777 |
| C | -0.02260 | 1.11674 | 0.65238  |
| O | 0.12583  | 2.33217 | 0.32852  |
| C | -0.08069 | 0.82426 | 2.13732  |
| F | -0.39473 | 0.43278 | 3.35600  |

69: [CF<sub>3</sub>]<sup>+</sup>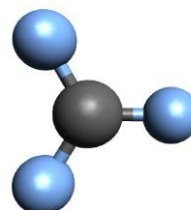

|   |           |           |          |
|---|-----------|-----------|----------|
| C | -0.897648 | 0.672459  | 3.151118 |
| F | -1.715082 | 1.465693  | 2.670745 |
| F | -1.270271 | -0.442350 | 3.533251 |
| F | 0.291811  | 0.993727  | 3.250566 |

69: [C<sub>2</sub>H<sub>2</sub>CFC]<sup>+</sup>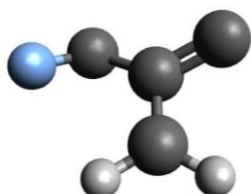

|   |          |         |         |
|---|----------|---------|---------|
| C | 0.12399  | 0.60029 | 0.52930 |
| C | -0.63267 | 0.03731 | 1.48345 |
| C | -1.20351 | 0.58700 | 2.84325 |

69: [CCCOOH]<sup>+</sup>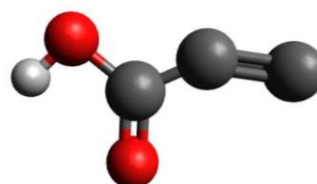

|   |         |         |          |
|---|---------|---------|----------|
| O | 0.29521 | 0.41203 | -1.19331 |
| C | 0.03226 | 0.83887 | 0.07927  |
| H | 0.61304 | 1.25299 | -1.56923 |

|   |          |          |         |   |          |          |         |
|---|----------|----------|---------|---|----------|----------|---------|
| C | -0.80563 | -1.28147 | 1.09041 | O | 0.19179  | 1.99648  | 0.52057 |
| H | -0.70608 | -1.60836 | 0.05891 | C | -0.43063 | -0.05827 | 0.90741 |
| H | -1.07759 | -2.03472 | 1.83151 | C | -1.03901 | -0.31550 | 2.22124 |
| F | -1.00075 | -0.27723 | 3.73735 |   |          |          |         |

|                       |                                                                                   |                                        |                                                                                     |   |           |           |          |
|-----------------------|-----------------------------------------------------------------------------------|----------------------------------------|-------------------------------------------------------------------------------------|---|-----------|-----------|----------|
| 45: $[\text{COOH}]^+$ | 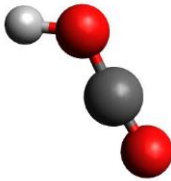 | 45: $[\text{C}_2\text{H}_2\text{F}]^+$ |  |   |           |           |          |
| O                     | 0.163971                                                                          | 0.456562                               | -0.713743                                                                           | C | -0.344823 | -0.201153 | 1.973372 |
| C                     | 0.118842                                                                          | 1.289601                               | 0.175121                                                                            | C | -0.730539 | -1.227962 | 1.351509 |
| H                     | 0.477129                                                                          | 0.700101                               | -1.620445                                                                           | H | -0.525187 | -1.333141 | 0.280338 |
| O                     | 0.039517                                                                          | 1.976606                               | 1.058847                                                                            | H | -1.275686 | -2.018548 | 1.879214 |
|                       |                                                                                   |                                        |                                                                                     | F | 0.024954  | 0.784395  | 2.570756 |

|    |                                                                                     |          |                                                                                       |   |           |          |          |
|----|-------------------------------------------------------------------------------------|----------|---------------------------------------------------------------------------------------|---|-----------|----------|----------|
| OH | 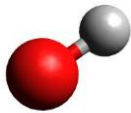 | HF       |  |   |           |          |          |
| O  | 0.051485                                                                            | 0.349029 | -0.799532                                                                             | F | -4.142426 | 1.660500 | 0.000000 |
| H  | 0.232015                                                                            | 1.097391 | -1.401098                                                                             | H | -3.217694 | 1.660500 | 0.000000 |

|              |                                                                                     |               |                                                                                      |   |          |          |           |
|--------------|-------------------------------------------------------------------------------------|---------------|--------------------------------------------------------------------------------------|---|----------|----------|-----------|
| $\text{F}_2$ |  | $\text{CO}_2$ |  |   |          |          |           |
| F            | -1.694213                                                                           | 3.310000      | 0.000000                                                                             | O | 0.084587 | 0.221063 | -0.635473 |
| F            | -0.297557                                                                           | 3.278860      | 0.000000                                                                             | C | 0.102208 | 1.125020 | 0.091090  |

|  |   |          |          |          |
|--|---|----------|----------|----------|
|  | O | 0.119825 | 2.028977 | 0.817653 |
|--|---|----------|----------|----------|

|             |                                                                                   |           |                                                                                     |   |           |          |          |
|-------------|-----------------------------------------------------------------------------------|-----------|-------------------------------------------------------------------------------------|---|-----------|----------|----------|
| <b>COOH</b> | 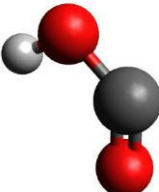 | <b>CO</b> |  |   |           |          |          |
| O           | 0.154440                                                                          | 0.357696  | -0.765732                                                                           | O | -3.056178 | 0.172640 | 0.000000 |
| C           | -0.018901                                                                         | 0.975054  | 0.392429                                                                            | C | -1.931082 | 0.172640 | 0.000000 |
| H           | 0.495149                                                                          | 0.990814  | -1.431079                                                                           |   |           |          |          |
| O           | 0.168772                                                                          | 2.099305  | 0.704162                                                                            |   |           |          |          |

|              |                                                                                    |                                       |                                                                                     |   |           |           |           |
|--------------|------------------------------------------------------------------------------------|---------------------------------------|-------------------------------------------------------------------------------------|---|-----------|-----------|-----------|
| <b>FCOOH</b> | 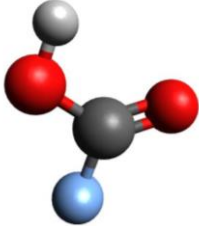 | <b>C<sub>2</sub>H<sub>2</sub>COOH</b> |  |   |           |           |           |
| O            | 0.283750                                                                           | 0.344636                              | -0.170009                                                                           | O | 0.619132  | 0.647140  | -0.996814 |
| C            | 0.189697                                                                           | 1.255233                              | 0.795710                                                                            | C | -0.080200 | 0.793059  | 0.158394  |
| H            | 0.317450                                                                           | 0.817668                              | -1.014764                                                                           | H | 0.747537  | 1.539332  | -1.356396 |
| O            | 0.152072                                                                           | 2.435658                              | 0.698247                                                                            | O | -0.436774 | 1.873239  | 0.586476  |
| F            | 0.141401                                                                           | 0.611346                              | 1.958795                                                                            | C | -0.309808 | -0.442296 | 0.821768  |
|              |                                                                                    |                                       |                                                                                     | C | -0.911580 | -1.491509 | 1.276807  |
|              |                                                                                    |                                       |                                                                                     | H | -1.926585 | -1.749424 | 0.971434  |
|              |                                                                                    |                                       |                                                                                     | H | -0.435181 | -2.168561 | 1.982370  |

|                      |                                                                                     |                       |                                                                                       |   |           |          |          |
|----------------------|-------------------------------------------------------------------------------------|-----------------------|---------------------------------------------------------------------------------------|---|-----------|----------|----------|
| <b>H<sub>2</sub></b> |  | <b>CF<sub>3</sub></b> |  |   |           |          |          |
| H                    | -1.097526                                                                           | -0.308611             | 0.000000                                                                              | C | -0.844333 | 0.561206 | 2.880149 |

|   |           |           |          |   |           |           |          |
|---|-----------|-----------|----------|---|-----------|-----------|----------|
| H | -0.353794 | -0.328839 | 0.000000 | F | -1.747713 | 1.516620  | 2.746984 |
|   |           |           |          | F | -1.295625 | -0.426542 | 3.633055 |
|   |           |           |          | F | 0.296481  | 1.038246  | 3.345492 |

|                        |                                                                                   |           |                                                                                     |   |           |           |          |
|------------------------|-----------------------------------------------------------------------------------|-----------|-------------------------------------------------------------------------------------|---|-----------|-----------|----------|
| <b>HCF<sub>3</sub></b> | 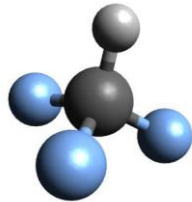 | <b>CF</b> |  |   |           |           |          |
| C                      | -0.828602                                                                         | 0.566388  | 2.821566                                                                            | C | -0.583764 | 0.476513  | 2.548773 |
| F                      | -1.750045                                                                         | 1.539670  | 2.783071                                                                            | F | -1.386796 | -0.248003 | 1.871987 |
| F                      | -1.286609                                                                         | -0.422074 | 3.601900                                                                            |   |           |           |          |
| F                      | 0.288484                                                                          | 1.060551  | 3.373542                                                                            |   |           |           |          |
| H                      | -0.625007                                                                         | 0.195744  | 1.816381                                                                            |   |           |           |          |

|                                                 |                                                                                     |                        |                                                                                       |   |           |           |          |
|-------------------------------------------------|-------------------------------------------------------------------------------------|------------------------|---------------------------------------------------------------------------------------|---|-----------|-----------|----------|
| <b>C<sub>2</sub>H<sub>2</sub>CF<sub>3</sub></b> | 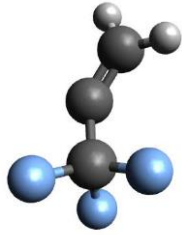 | <b>CHF<sub>2</sub></b> |  |   |           |           |          |
| C                                               | -0.654341                                                                           | -0.151028              | 1.579114                                                                              | C | -0.229508 | 0.216123  | 2.485844 |
| C                                               | -0.850686                                                                           | 0.562605               | 2.855542                                                                              | F | -1.470851 | 0.075095  | 2.029949 |
| C                                               | -0.783802                                                                           | -1.364092              | 1.127771                                                                              | F | -0.098248 | 1.337262  | 3.188771 |
| H                                               | -0.561646                                                                           | -1.621617              | 0.097326                                                                              | H | 0.167167  | -0.669330 | 2.981156 |
| H                                               | -1.123345                                                                           | -2.174354              | 1.774387                                                                              |   |           |           |          |
| F                                               | -1.728158                                                                           | 1.574831               | 2.725400                                                                              |   |           |           |          |
| F                                               | -1.328079                                                                           | -0.260092              | 3.820782                                                                              |   |           |           |          |
| F                                               | 0.302687                                                                            | 1.085238               | 3.312367                                                                              |   |           |           |          |

| CF <sub>2</sub> COOH                                                              |           |           |           | CF <sub>2</sub>                                                                     |           |           |          |
|-----------------------------------------------------------------------------------|-----------|-----------|-----------|-------------------------------------------------------------------------------------|-----------|-----------|----------|
| 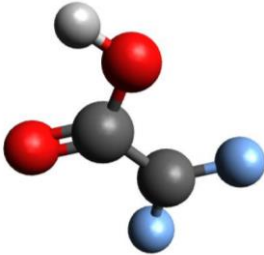 |           |           |           |  |           |           |          |
| O                                                                                 | 0.554141  | 0.064756  | 0.281852  | C                                                                                   | -0.756078 | 0.723533  | 2.569452 |
| C                                                                                 | 0.317691  | 1.092735  | 1.132417  | F                                                                                   | -0.906867 | -0.452935 | 2.027906 |
| H                                                                                 | 1.085853  | 0.423364  | -0.445154 | F                                                                                   | 0.433574  | 0.693453  | 3.102478 |
| O                                                                                 | 0.718060  | 2.227031  | 0.980554  |                                                                                     |           |           |          |
| C                                                                                 | -0.465554 | 0.678154  | 2.262818  |                                                                                     |           |           |          |
| F                                                                                 | -0.948625 | -0.528330 | 2.428363  |                                                                                     |           |           |          |
| F                                                                                 | -0.845875 | 1.525080  | 3.180539  |                                                                                     |           |           |          |

Table S2: Comparison of appearance energies (AEs) and threshold values calculated at the B3LYP and the DLPNO-CCSD(T) level of theory for potential reactions leading to the respective m/z ratios in DI of TFMAA.

| Fragment | Product                                                                                                                                                                                                     | AE (eV)           | B3LYP (eV) | DLPNO-CCSD(T) (eV) |
|----------|-------------------------------------------------------------------------------------------------------------------------------------------------------------------------------------------------------------|-------------------|------------|--------------------|
| 95       | [C <sub>2</sub> HF <sub>2</sub> O <sub>2</sub> ] <sup>+</sup> + C <sub>2</sub> H + HF                                                                                                                       | <b>13.2 ± 0.3</b> | 15.81      | 15.83              |
|          | [C <sub>2</sub> HF <sub>2</sub> O <sub>2</sub> ] <sup>+</sup> + C <sub>2</sub> H <sub>2</sub> F                                                                                                             |                   | 13.35      | 13.73              |
|          | [C <sub>2</sub> HF <sub>2</sub> O <sub>2</sub> ] <sup>+</sup> + C <sub>2</sub> H <sub>2</sub> + F                                                                                                           |                   | 17.32      | 17.52              |
| 76       | [C <sub>2</sub> HFO <sub>2</sub> ] <sup>+</sup> + C <sub>2</sub> H <sub>2</sub> + F + F                                                                                                                     | <b>11.2 ± 0.3</b> | 20.99      | 21.33              |
|          | [C <sub>2</sub> HFO <sub>2</sub> ] <sup>+</sup> + C <sub>2</sub> H <sub>2</sub> + F <sub>2</sub>                                                                                                            |                   | 19.45      | 19.89              |
|          | [C <sub>2</sub> HFO <sub>2</sub> ] <sup>+</sup> + C <sub>2</sub> H <sub>2</sub> F <sub>2</sub> (Difluoroethylene)        |                   | 13.45      | 14                 |
|          | [C <sub>2</sub> HFO <sub>2</sub> ] <sup>+</sup> + C <sub>2</sub> H <sub>2</sub> F <sub>2</sub> (Cis-Difluoroethylene)    |                   | 13.87      | 14.44              |
|          | [C <sub>2</sub> HFO <sub>2</sub> ] <sup>+</sup> + C <sub>2</sub> H <sub>2</sub> F <sub>2</sub> (Trans-Difluoroethylene)  |                   | 13.90      | 14.47              |
| 75       | [C <sub>2</sub> FO <sub>2</sub> ] <sup>+</sup> + C <sub>2</sub> H <sub>2</sub> + HF + F                                                                                                                     | <b>13.2 ± 0.2</b> | 18.94      | 19.04              |
|          | [C <sub>2</sub> FO <sub>2</sub> ] <sup>+</sup> + C <sub>2</sub> H <sub>2</sub> + H + F + F                                                                                                                  |                   | 24.62      | 24.63              |
|          | [C <sub>2</sub> FO <sub>2</sub> ] <sup>+</sup> + C <sub>2</sub> H + HF + HF                                                                                                                                 |                   | 17.43      | 17.35              |
